# Supplementary material for: Preparation of a cyclotriphosphazene microsphere bearing a phosphaphenanthrene structure towards fire-safety and mechanical enhancement for epoxy and its aramid fiber composite
Source: Royal Society of Chemistry journal article supplement (doi:10.1039/d3ma01074k), 2024-01-01
Supplement: d3ma01074k1.pdf [file d3ma01074k1.pdf]

## Supporting Information

### Preparation of cyclotriphosphazene microsphere bearing phosphaphenanthrene structure towards fire-safety and mechanic-enhancement for epoxy and its aramid fiber composite

Yunxian Yang <sup>a, b, c\*</sup>, Qi Zhang <sup>c</sup>, Yiwen Hao <sup>a,c</sup>, Xuke Lan <sup>c</sup>, Laia Haurie <sup>d</sup>, Dezhi Zheng <sup>b</sup>, Guangyan Huang <sup>a, c\*</sup>

<sup>a</sup> State Key Laboratory of Explosion Science and Safety Protection, Beijing Institute of Technology, Beijing 100081, P. R. China

<sup>b</sup> Advanced Research Institute of Multidisciplinary Sciences, Beijing Institute of Technology, Beijing 100081, P. R. China

<sup>c</sup> Chongqing Innovation Center, Beijing Institute of Technology, Chongqing, 401120, P. R. China

<sup>d</sup> Department of Tecnologia de l'Arquitectura, Universitat Politècnica de Catalunya, Av. Dr. Marañon 44-50, 08028, Barcelona, Spain

Corresponding author: \*[huanggy@bit.edu.cn](mailto:huanggy@bit.edu.cn), \*[yunxian.yang@bit.edu.cn](mailto:yunxian.yang@bit.edu.cn)

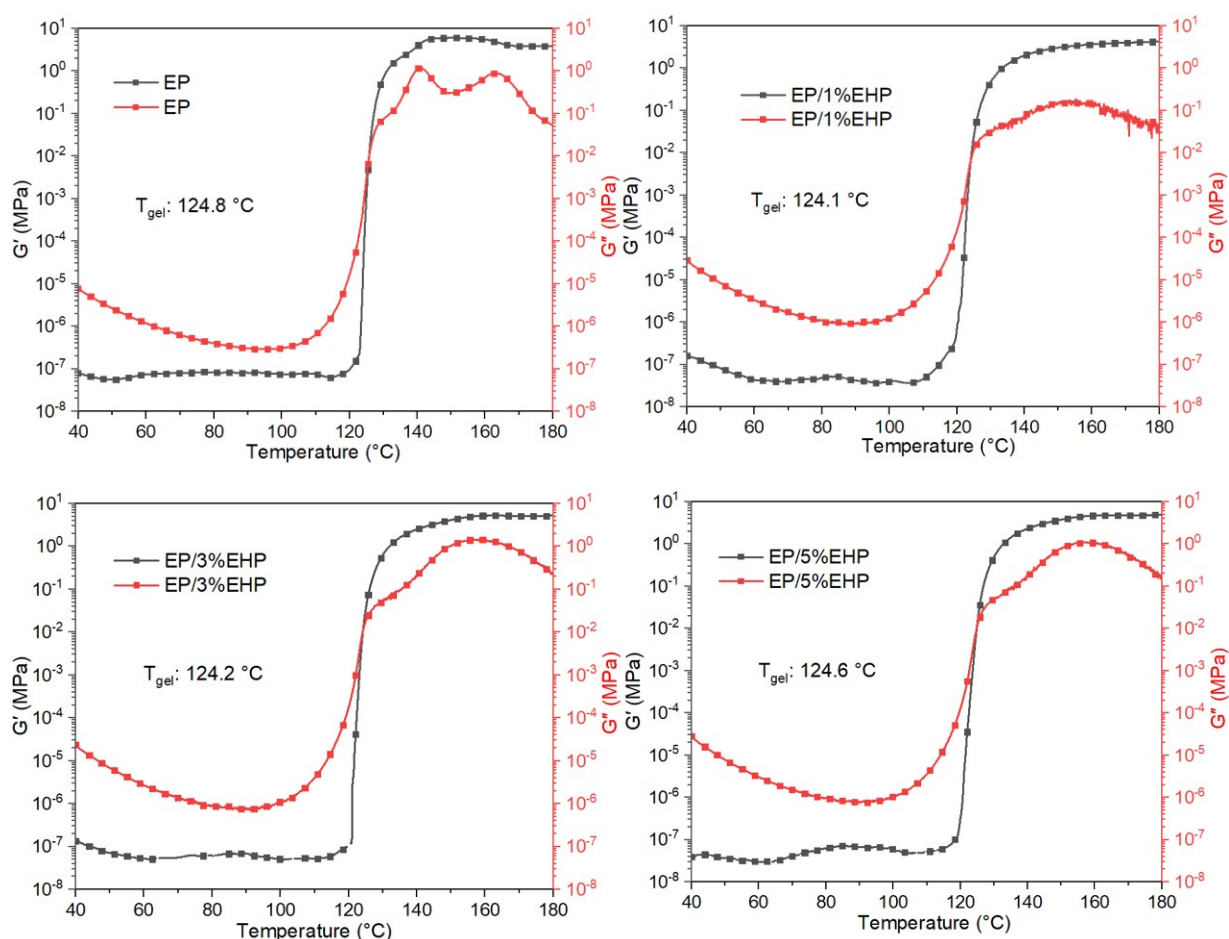

Figure S1 Rheology curves of modulus vs temperature for epoxy resins
